# Supplementary material for: A new phase-matchable nonlinear optical silicate: Rb2ZnSi3O8
Source: Royal Society of Chemistry journal article supplement (doi:10.1039/c7tc03000b), 2017-01-01
Supplement: c7tc03000b1.pdf [file c7tc03000b1.pdf]

## Supporting Information

### A new phase-matchable nonlinear optical silicate: $\text{Rb}_2\text{ZnSi}_3\text{O}_8$ †

Bingqing Zhao,<sup>ae</sup> Yi Yang,<sup>bce</sup> Sangen Zhao,<sup>\*a</sup> Yaoguo Shen,<sup>acd</sup> Xianfeng Li,<sup>a</sup> Lina Li,<sup>a</sup> Chengmin Ji,<sup>a</sup> Zheshuai Lin<sup>b</sup>  
and Junhua Luo<sup>\*a</sup>

#### Contents

|                                                                                                                           |    |
|---------------------------------------------------------------------------------------------------------------------------|----|
| Fig. S1. The SHG response of $\text{Rb}_2\text{ZnSi}_3\text{O}_8$ .....                                                   | S2 |
| Fig. S2. DTA curves for $\text{Rb}_2\text{ZnSi}_3\text{O}_8$ .....                                                        | S2 |
| Fig. S3 The hygroscopicity for $\text{Rb}_2\text{ZnSi}_3\text{O}_8$ .....                                                 | S2 |
| Table S1 Calculated nonlinear optical properties of $\text{Rb}_2\text{ZnSi}_3\text{O}_8$ .....                            | S2 |
| Table S2 Atom coordinates and equivalent isotropic displacement parameters for $\text{Rb}_2\text{ZnSi}_3\text{O}_8$ ..... | S3 |
| Table S3 Anisotropic displacement parameters for $\text{Rb}_2\text{ZnSi}_3\text{O}_8$ .....                               | S4 |
| Table S4. Selected bond distances and angles for $\text{Rb}_2\text{ZnSi}_3\text{O}_8$ .....                               | S5 |

---

<sup>a</sup> State Key Laboratory of Structural Chemistry, Fujian Institute of Research on the Structure of Matter, Chinese Academy of Sciences, Fuzhou 350002, China.

Email: [jhluo@fjirsm.ac.cn](mailto:jhluo@fjirsm.ac.cn), [zhaosangen@fjirsm.ac.cn](mailto:zhaosangen@fjirsm.ac.cn)

<sup>b</sup> Beijing Center for Crystal R&D, Key Lab of Functional Crystals and Laser Technology of Chinese Academy of Sciences, Technical Institute of Physics and Chemistry, Chinese Academy of Sciences, Beijing 100190, China.

Email: [zslin@mail.ipc.ac.cn](mailto:zslin@mail.ipc.ac.cn)

<sup>c</sup> University of Chinese Academy of Sciences, Beijing 100049, China

<sup>d</sup> Department of Physics and Electronic Information Engineering, Minjiang University, Fuzhou, Fujian 350108, China

<sup>e</sup> These authors contributed equally.

---

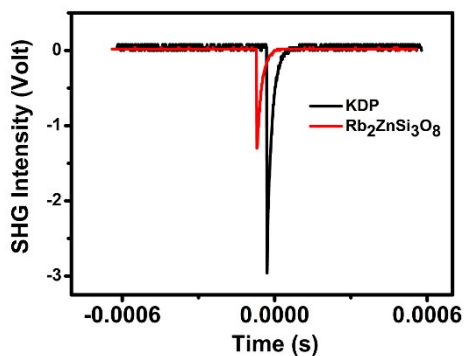

Fig. S1. The SHG response of  $\text{Rb}_2\text{ZnSi}_3\text{O}_8$ .

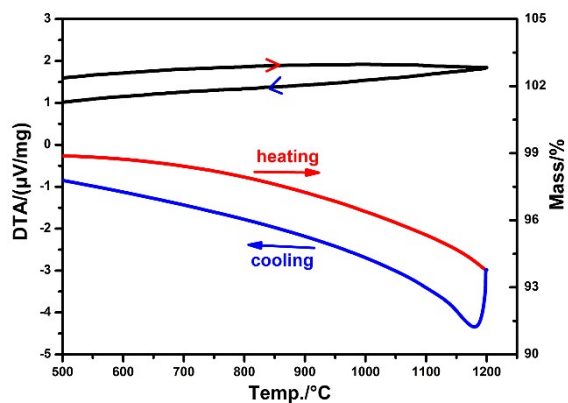

Fig. S2. DTA curves for  $\text{Rb}_2\text{ZnSi}_3\text{O}_8$ .

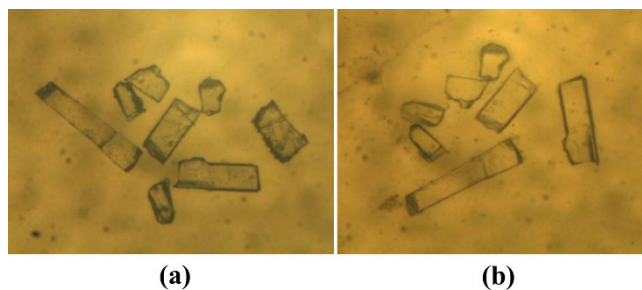

Fig. S3 The hygroscopy for  $\text{Rb}_2\text{ZnSi}_3\text{O}_8$ . (a) Without water at room temperature. (b) Be taken up from the water after 24 h .

Table S1. Calculated nonlinear optical properties of  $\text{Rb}_2\text{ZnSi}_3\text{O}_8$ .

|                                      | $d_{14}$ | $d_{16}$ | $d_{22}$ | $d_{23}$ |
|--------------------------------------|----------|----------|----------|----------|
| $\text{Rb}_2\text{ZnSi}_3\text{O}_8$ | -0.053   | 0.202    | -0.357   | 0.048    |
| Rb                                   | -0.008   | 0.008    | -0.079   | 0.015    |
| Si-O                                 | -0.021   | 0.081    | -0.314   | 0.027    |
| Zn-O                                 | -0.035   | 0.139    | -0.240   | 0.019    |

**Table S2. Atomic coordinates and equivalent isotropic displacement parameters for Rb<sub>2</sub>ZnSi<sub>3</sub>O<sub>8</sub>.**

| Atom | Wyck. | Site | S.O.F. | <i>x/a</i>  | <i>y/b</i> | <i>z/c</i>  | $U_{\text{eq}}$ [Å <sup>2</sup> ] <sup>a</sup> |
|------|-------|------|--------|-------------|------------|-------------|------------------------------------------------|
| Rb   | 4c    | 1    |        | 0.94866(7)  | 0.5327     | 0.70962(11) | 0.039(1)                                       |
| Zn2  | 4c    | 1    | 0.5    | 0.83652(13) | 1.0456(4)  | 0.89779(17) | 0.035(1)                                       |
| Si2  | 4c    | 1    | 0.5    | 0.83652(13) | 1.0456(4)  | 0.89779(17) | 0.035(1)                                       |
| Si1  | 4c    | 1    |        | 0.6597(2)   | 0.5448(6)  | 0.7168(3)   | 0.031(1)                                       |
| O4   | 4c    | 1    | 0.5    | 0.5009(12)  | 0.624(2)   | 0.4490(17)  | 0.031(1)                                       |
| O2   | 4c    | 1    |        | 0.7687(7)   | 0.7544(14) | 0.759(1)    | 0.044(2)                                       |
| O3   | 4c    | 1    |        | 0.6986(9)   | 0.2729(15) | 0.6902(11)  | 0.051(2)                                       |
| O1   | 4c    | 1    | 0.5    | 0.7143(9)   | 0.536(3)   | 0.9613(14)  | 0.032(2)                                       |
| O5   | 4c    | 1    | 0.5    | 0.6090(11)  | 0.548(3)   | 0.8350(16)  | 0.034(2)                                       |
| O6   | 4c    | 1    | 0.5    | 0.9929(8)   | 1.135(2)   | 1.023(2)    | 0.060(5)                                       |

<sup>a</sup>  $U_{\text{eq}}$  is defined as one-third of the trace of the orthogonalized  $U_{ij}$  tensor.

**Table S3. Anisotropic displacement parameters ( $\text{\AA}^2$ ) for  $\text{Rb}_2\text{ZnSi}_3\text{O}_8$ .**

| Atom | $U_{11}$  | $U_{22}$  | $U_{33}$  | $U_{12}$   | $U_{13}$  | $U_{23}$   |
|------|-----------|-----------|-----------|------------|-----------|------------|
| Rb1  | 0.0503(4) | 0.0349(4) | 0.0462(4) | 0.0094(4)  | 0.0392(3) | 0.0096(4)  |
| Zn2  | 0.0517(6) | 0.0252(5) | 0.0316(5) | -0.0031(8) | 0.0303(5) | -0.0012(6) |
| Si2  | 0.0517(6) | 0.0252(5) | 0.0316(5) | -0.0031(8) | 0.0303(5) | -0.0012(6) |
| Si1  | 0.0374(8) | 0.0242(8) | 0.0424(9) | 0.0008(11) | 0.0318(8) | 0.0007(12) |
| O4   | 0.034(5)  | 0.033(5)  | 0.025(5)  | 0.000(4)   | 0.021(5)  | 0.003(3)   |
| O2   | 0.035(3)  | 0.056(4)  | 0.036(3)  | -0.013(3)  | 0.023(3)  | -0.003(3)  |
| O3   | 0.050(4)  | 0.046(3)  | 0.030(3)  | 0.026(3)   | 0.019(3)  | 0.000(3)   |
| O1   | 0.029(4)  | 0.039(5)  | 0.030(4)  | -0.006(7)  | 0.022(4)  | 0.007(7)   |
| O5   | 0.040(5)  | 0.033(5)  | 0.035(5)  | 0.009(7)   | 0.027(4)  | 0.009(7)   |
| O6   | 0.104(8)  | 0.036(5)  | 0.022(7)  | -0.0016(6) | 0.037(5)  | 0.000(4)   |

**Table S4. Selected bond distances (Å) and angles (deg.) for Rb<sub>2</sub>ZnSi<sub>3</sub>O<sub>8</sub>.**

|                                          |           |                                          |           |
|------------------------------------------|-----------|------------------------------------------|-----------|
| Rb1—O6 <sup>i</sup>                      | 2.841(13) | Si—O1                                    | 1.717(8)  |
| Rb1—O3 <sup>ii</sup>                     | 2.859(7)  | Zn2—O6                                   | 1.832(10) |
| Rb1—O4 <sup>iii</sup>                    | 2.884(10) | Zn2—O2                                   | 1.781(8)  |
| Rb1—O5 <sup>iv</sup>                     | 2.995(15) | Zn2—O3 <sup>ix</sup>                     | 1.846(7)  |
| Si1—O2                                   | 1.617(7)  | Si2—O6 <sup>viii</sup>                   | 1.542(5)  |
| Si1—O3                                   | 1.603(4)  | Si2—O1                                   | 1.743(8)  |
| O6—Zn2—O1 <sup>viii</sup>                | 116.6(6)  | O3 <sup>ix</sup> —Zn2—O5 <sup>viii</sup> | 118.5(5)  |
| O6—Zn2—O2                                | 122.0(5)  | O5—Si1—O2                                | 122.1(7)  |
| O1 <sup>viii</sup> —Zn2—O2               | 102.0(5)  | O4 <sup>xii</sup> —Si1—O3                | 117.5(5)  |
| O2—Zn2—O3 <sup>ix</sup>                  | 103.2(4)  | O3—Si1—O1                                | 104.8(6)  |
| O6—Zn2—O3 <sup>ix</sup>                  | 111.7(6)  | O5—Si1—O4                                | 104.2(5)  |
| O6 <sup>v</sup> —Zn2—O5 <sup>viii</sup>  | 102.1(5)  | O5—Si1—O3                                | 114.9(8)  |
| O1 <sup>viii</sup> —Zn2—O3 <sup>ix</sup> | 97.9(5)   | O4 <sup>xii</sup> —Si1—O2                | 113.5(5)  |

Symmetry codes: (i)  $-x+2, y-1, -z+2$ ; (ii)  $-x+3/2, y+1/2, -z+1$ ; (iii)  $-x+3/2, y-1/2, -z+1$ ; (iv)  $x+1/2, y-1/2, z$ ; (v)  $-x+2, y, -z+2$ ; (vi)  $x+1/2, y+1/2, z$ ; (vii)  $x, y-1, z$ ; (viii)  $-x+3/2, y+1/2, -z+2$ ; (ix)  $x, y+1, z$ ; (x)  $-x+2, y+1, -z+2$ ; (xi)  $x-1/2, y+1/2, z$ ; (xii)  $-x+1, y, -z+1$ ; (xiii)  $x-1/2, y-1/2, z$ ; (xiv)  $-x+3/2, y-1/2, -z+2$ .
